# Supplementary material
Source: PubMed Central journal article supplement (PMC3423902)
Supplement: NIHMS392349-supplement-1_si_001.pdf [file NIHMS392349-supplement-1_si_001.pdf]

## SUPPORTING INFORMATION

### Improved Separation of Complex Polycyclic Aromatic Hydrocarbon Mixtures Using Novel Column Combinations in GC×GC/ToF-MS

Carlos Manzano<sup>1</sup>, Eunha Hoh<sup>2</sup>, Staci L. Massey Simonich<sup>1,3\*</sup>

<sup>1</sup>Department of Chemistry, Oregon State University, Corvallis, Oregon

<sup>2</sup>Graduate School of Public Health, San Diego State University, San Diego, California

<sup>3</sup>Department of Environmental and Molecular Toxicology, Oregon State University,  
Corvallis, Oregon

\*Corresponding Author ([staci.simonich@oregonstate.edu](mailto:staci.simonich@oregonstate.edu), fax: 541-737-0497)

#### Contents

|                  |    |
|------------------|----|
| Figure S1:.....  | 2  |
| Figure S2:.....  | 3  |
| Figure S3.....   | 4  |
| Figure S4.....   | 5  |
| Figure S5.....   | 6  |
| Figure S6.....   | 7  |
| Figure S7.....   | 8  |
| Figure S8.....   | 9  |
| Figure S9.....   | 10 |
| Figure S10.....  | 11 |
| Figure S11.....  | 12 |
| Figure S12:..... | 13 |
| Table S1.....    | 14 |
| Table S2:.....   | 20 |

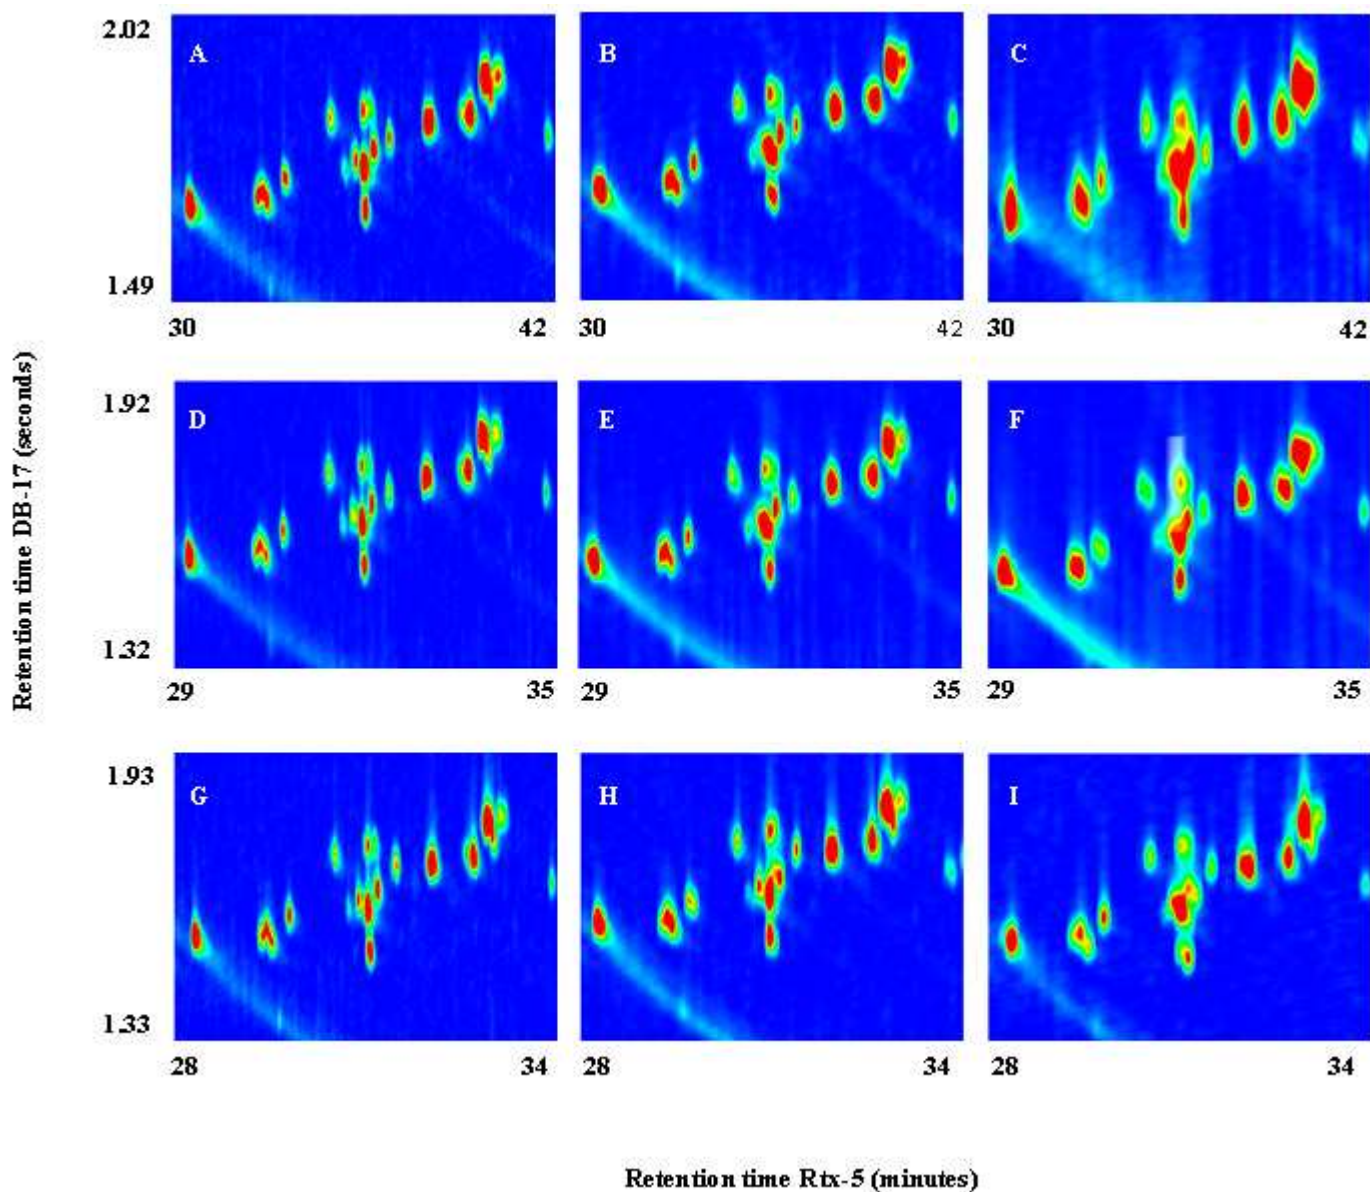

**Figure S1:** Chromatographic separation of PAHs using an Rtx-5ms in the first dimension and an Rxi-17 in the second dimension. A critical section of the chromatogram where more than three PAHs co-elute close together is shown. The boxes represent different conditions of separation, with modulation period (M, in seconds) and gas flow rate (F, in mL/min): A) M=3, F=0.8; B) M=5, F=0.8; C) M=7, F=0.8; D) M=3, F=1; E) M=5, F=1; F) M=7, F=1; G) M=3, F=1.2; H) M=5, F=1.2; I) M=7, F=1.2.

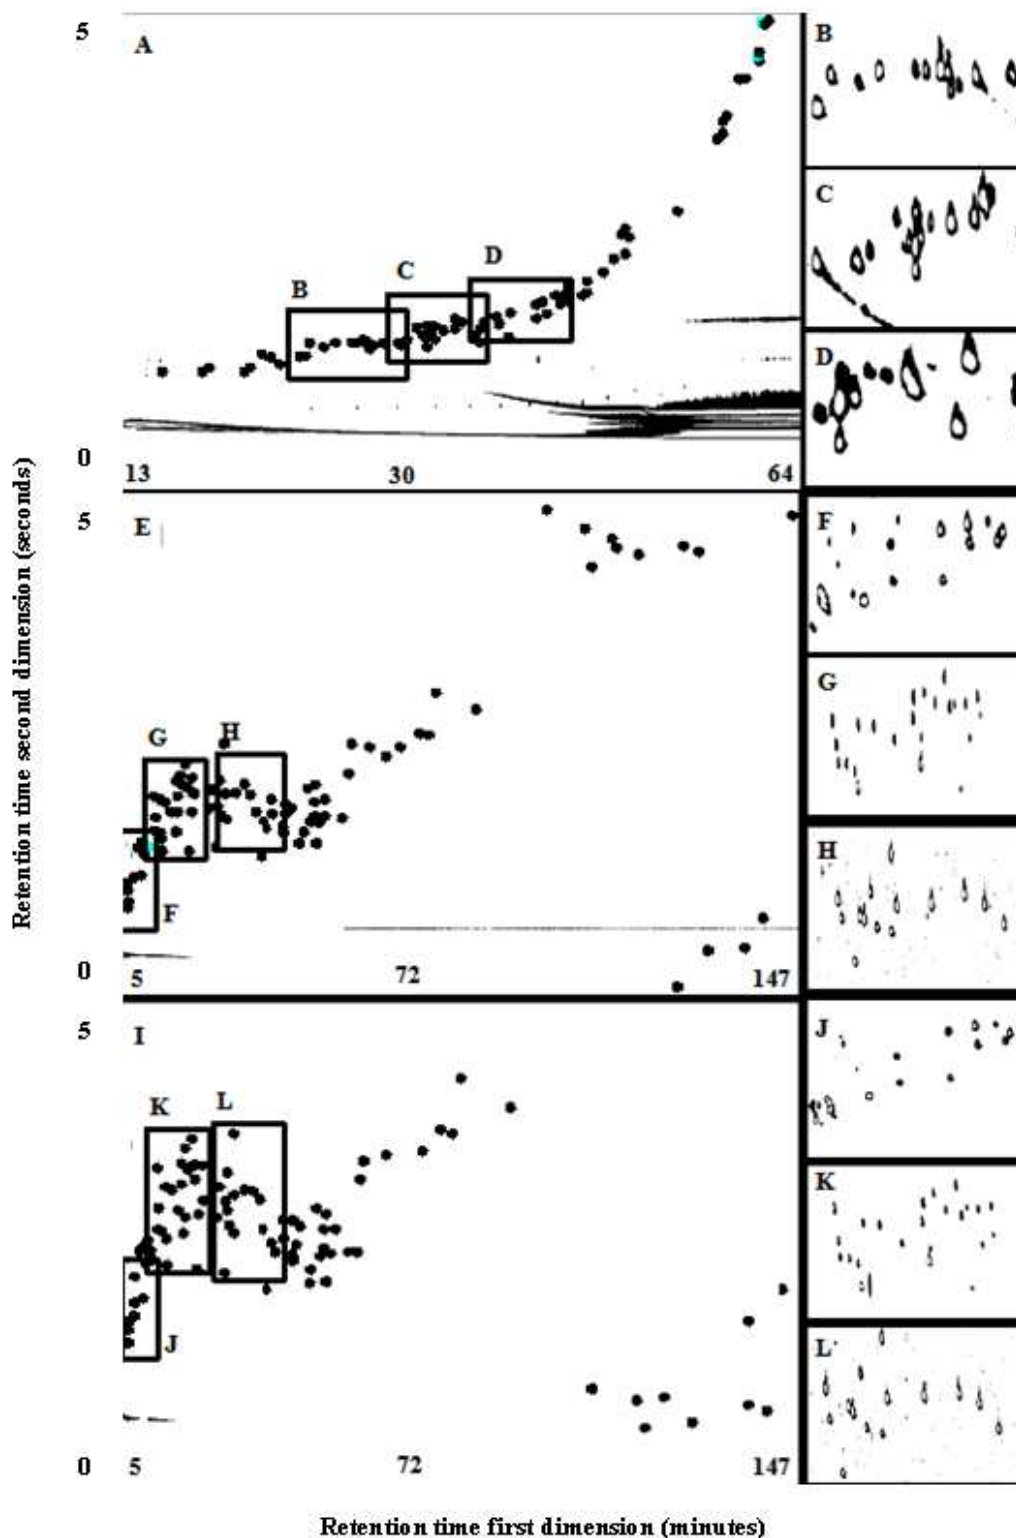

**Figure S2:** Black and white version of TICs showing the separation of 97 PAHs by GCxGC/ToF-MS with 3 column combinations: (A) Combination “A1” showing co-elution of PAHs at (1D ‘minutes’, 2D ‘seconds’): (B) 23.57, 1.19 to 30.24, 1.79; (C) 28.41, 1.30 to 34.24, 1.80; (D) 33.90, 1.37 to 37.23, 1.97. (E) TIC for Combination “B”, improved separation at (F) 5, 0.75 to 10.83, 1.65; (G) 10.58, 1.19 to 23.91, 2.69; (H) 22.99, 1.17 to 36.32, 2.67. (I) TIC for combination “C” further improvement in separation at: (J) 5, 1.00 to 11.67, 2.50; (K) 11.40, 1.68 to 24.75, 3.68; (L) 25.40, 1.89 to 38.73, 3.39.

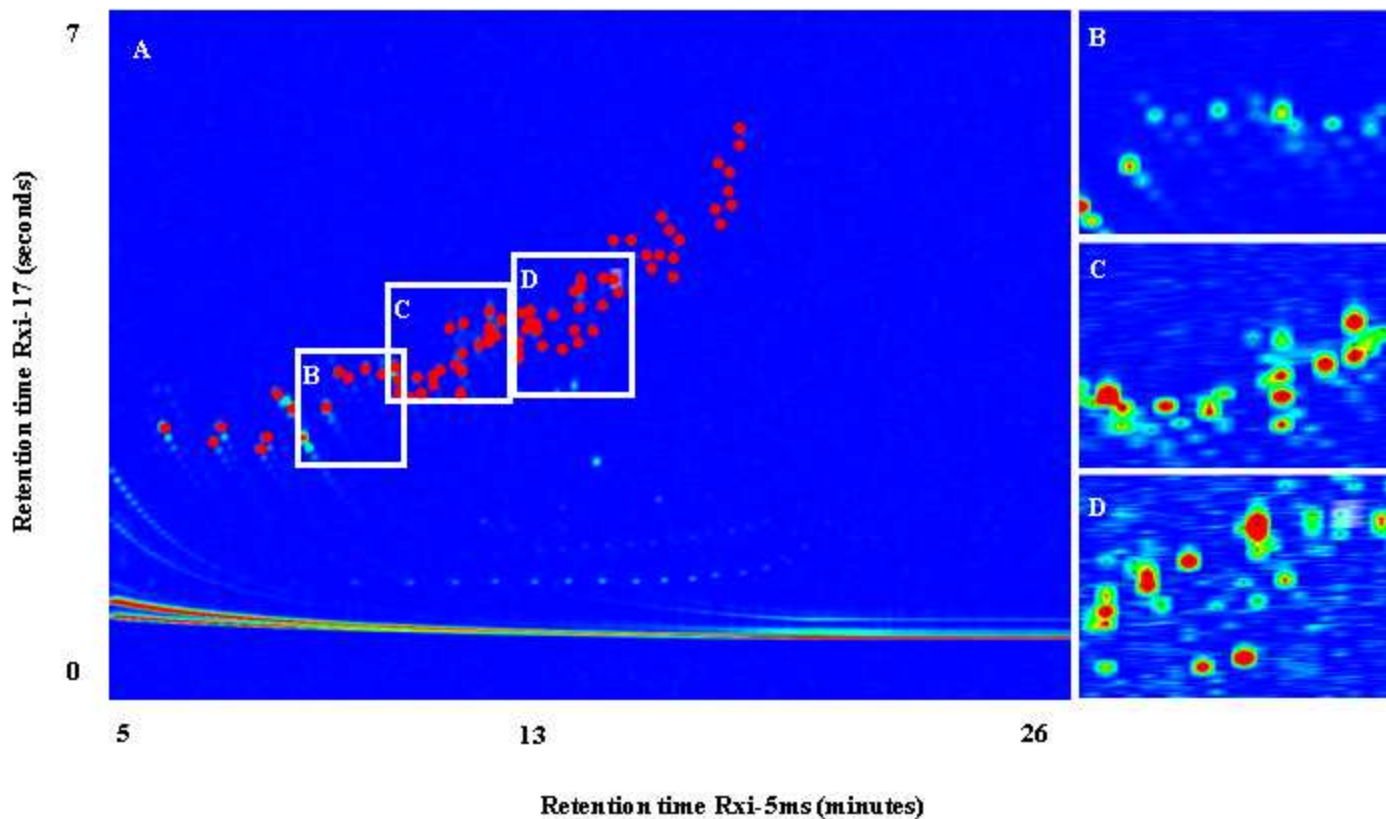

**Figure S3:** (A) Chromatogram showing the separation of 97 PAHs using column combination “A2”. The boxes show a closer view to the separation of PAHs at different sections in the chromatogram (1D ‘minutes’, 2D ‘seconds’): (B) 9.08, 1.47 to 12, 3.97; (C) 10.71, 2.79 to 13.21, 4.54; (D) 13.28, 2.89 to 15.78, 4.51.

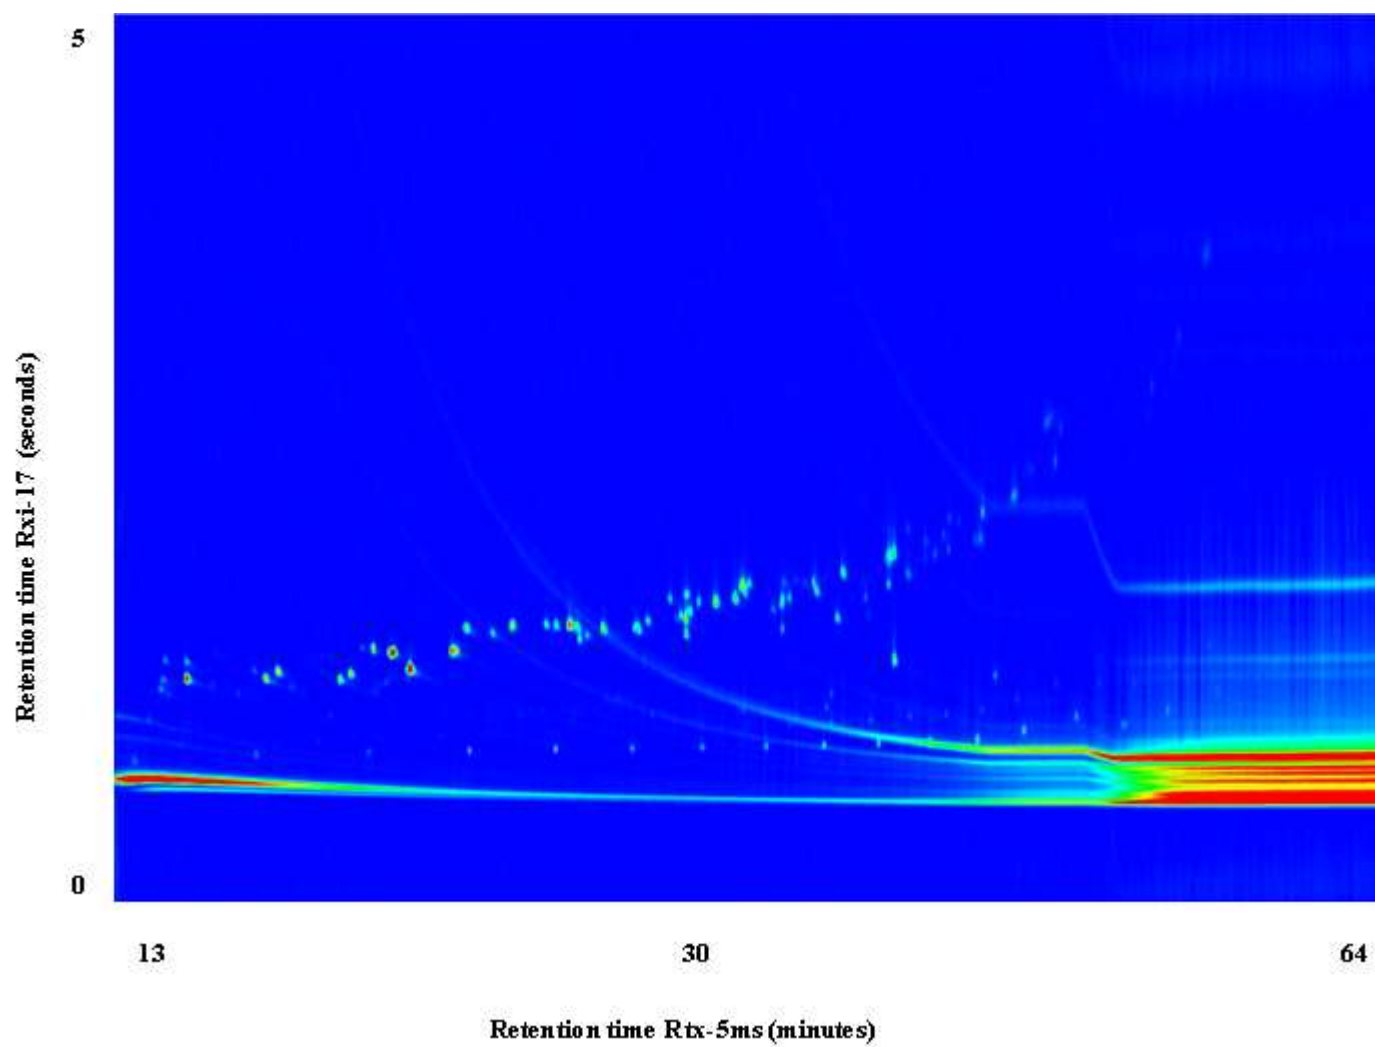

**Figure S4:** TIC showing the separation of 97 PAHs by GCxGC/ToF-MS using column combination “A1” (Rtx-5ms × Rxi-17)

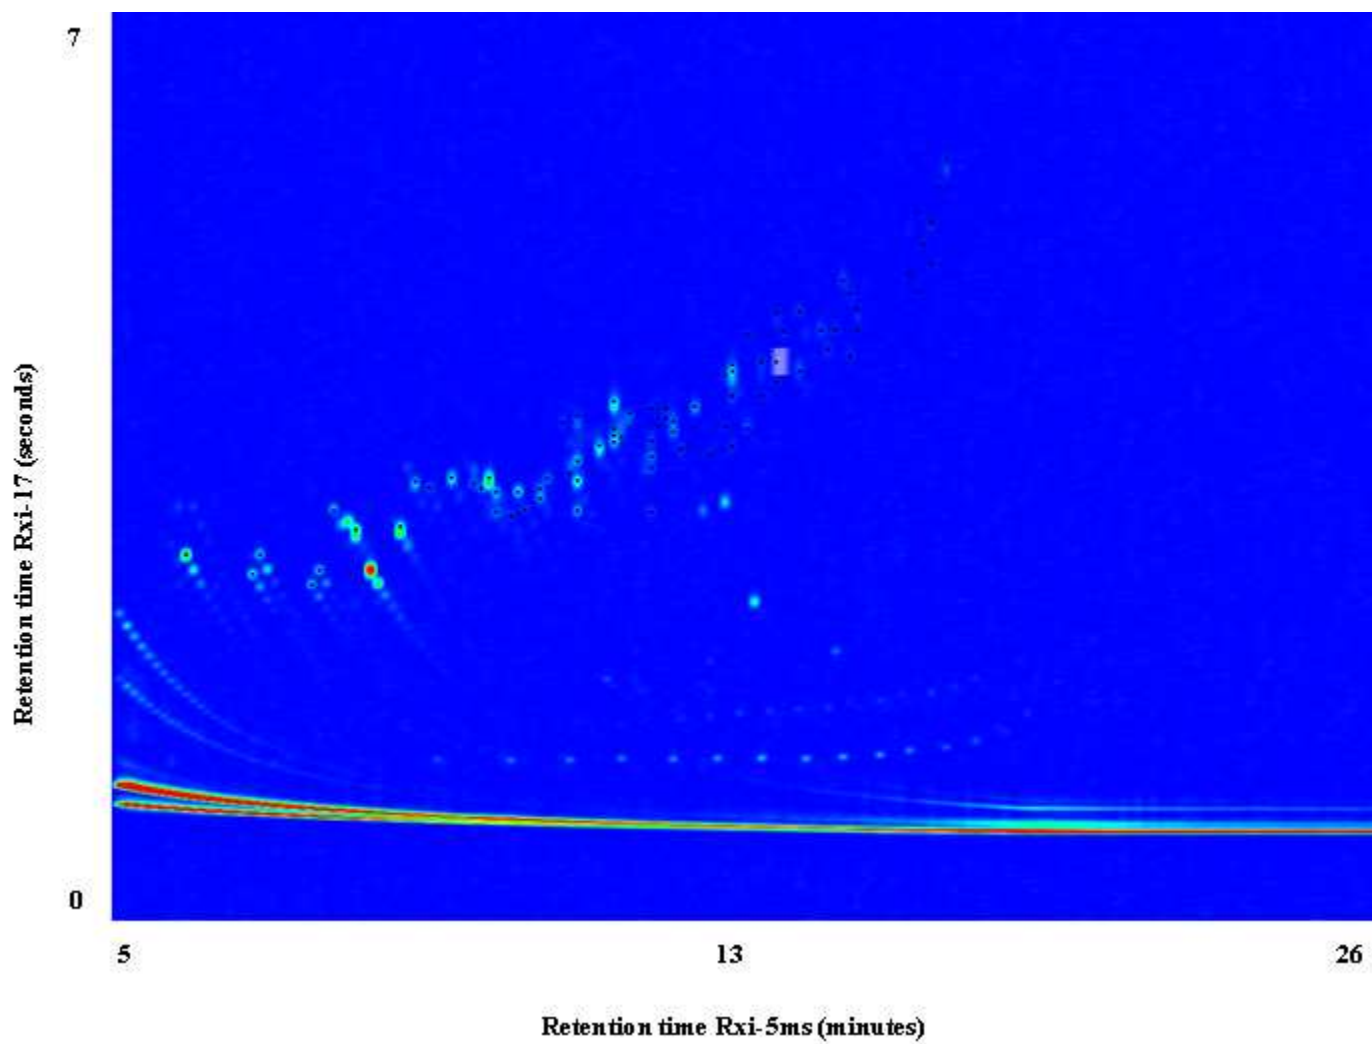

**Figure S5:** TIC showing the separation of 97 PAHs by GC×GC/ToF-MS using column combination “A2” (Rxi-5ms × Rxi-17)

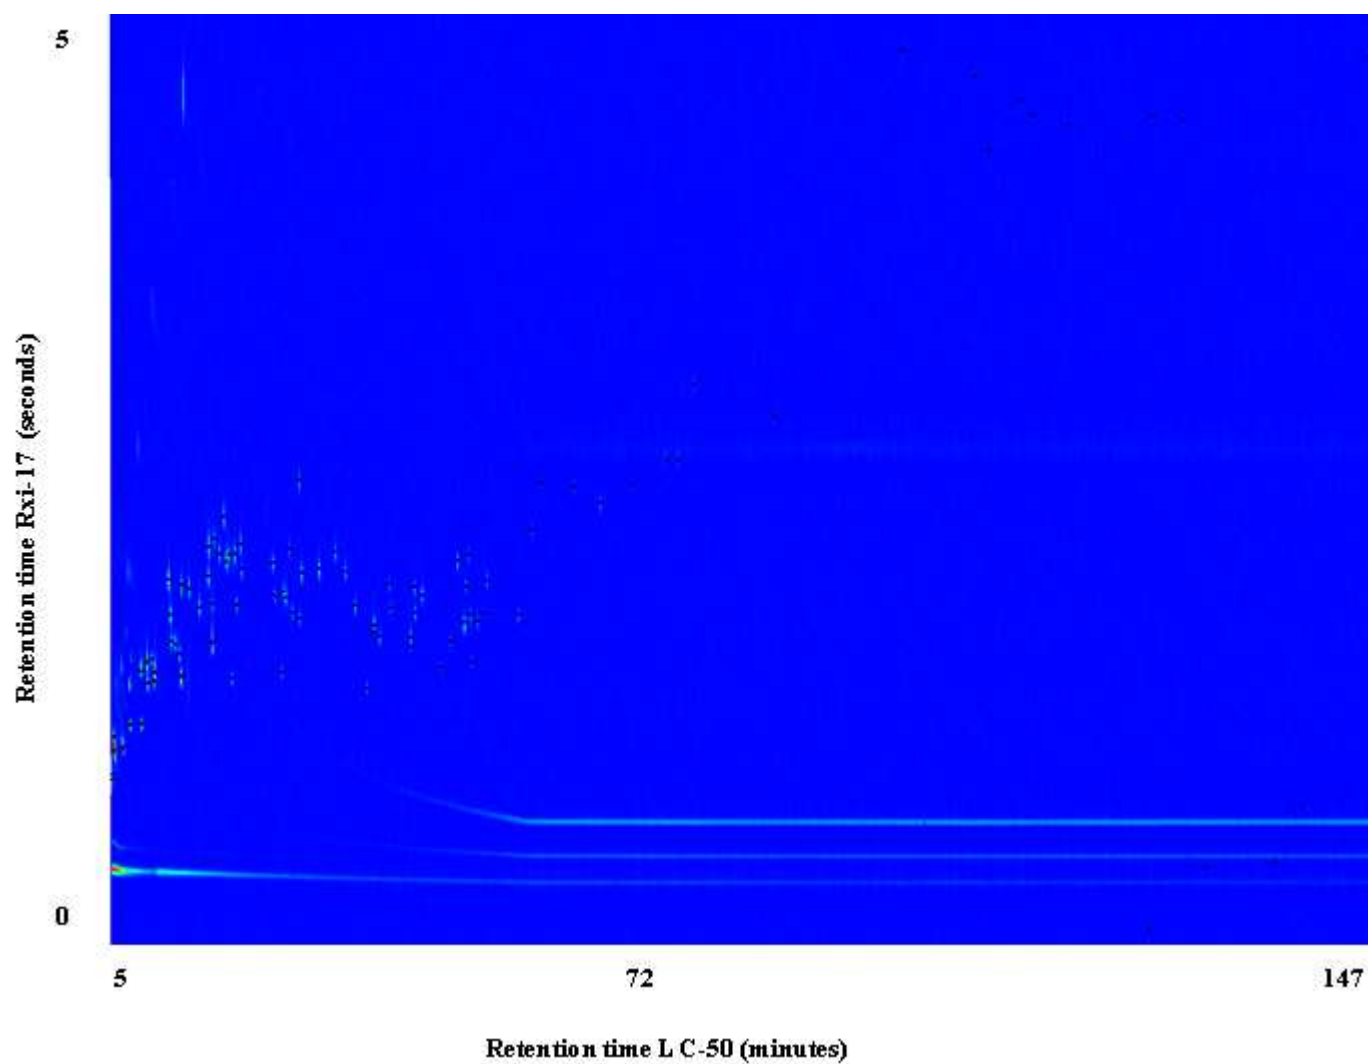

**Figure S6:** TIC showing the separation of 97 PAHs by GC×GC/ToF-MS using column combination “B” (LC-50 × Rxi-17)

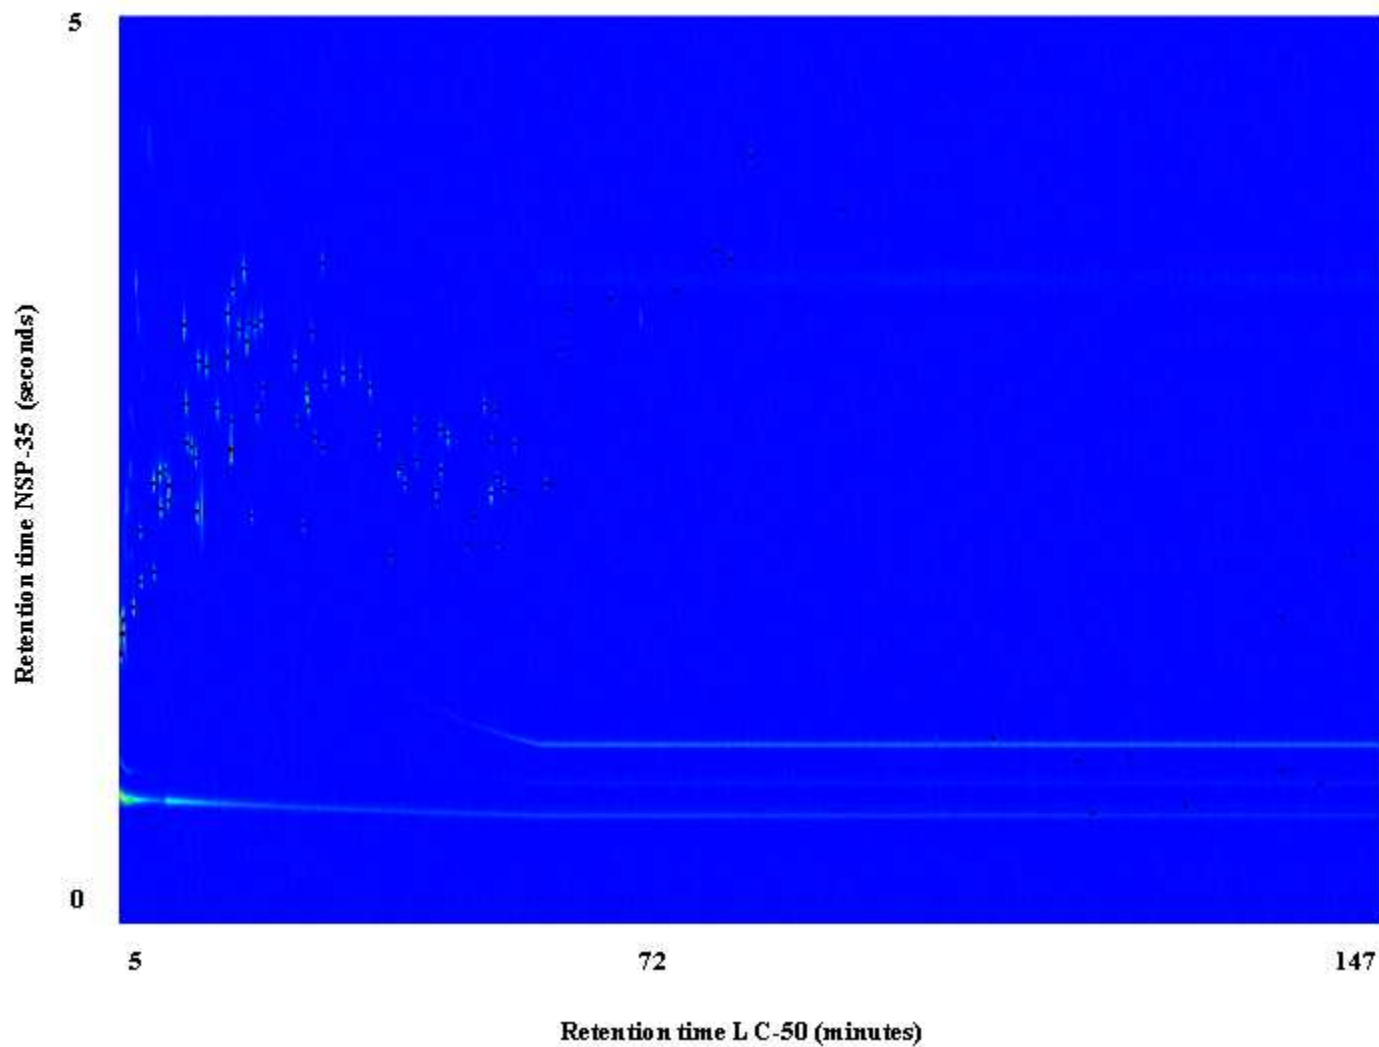

**Figure S7:** TIC showing the separation of 97 PAHs by GC×GC/ToF-MS using column combination “C” (LC-50 × NSP-35)



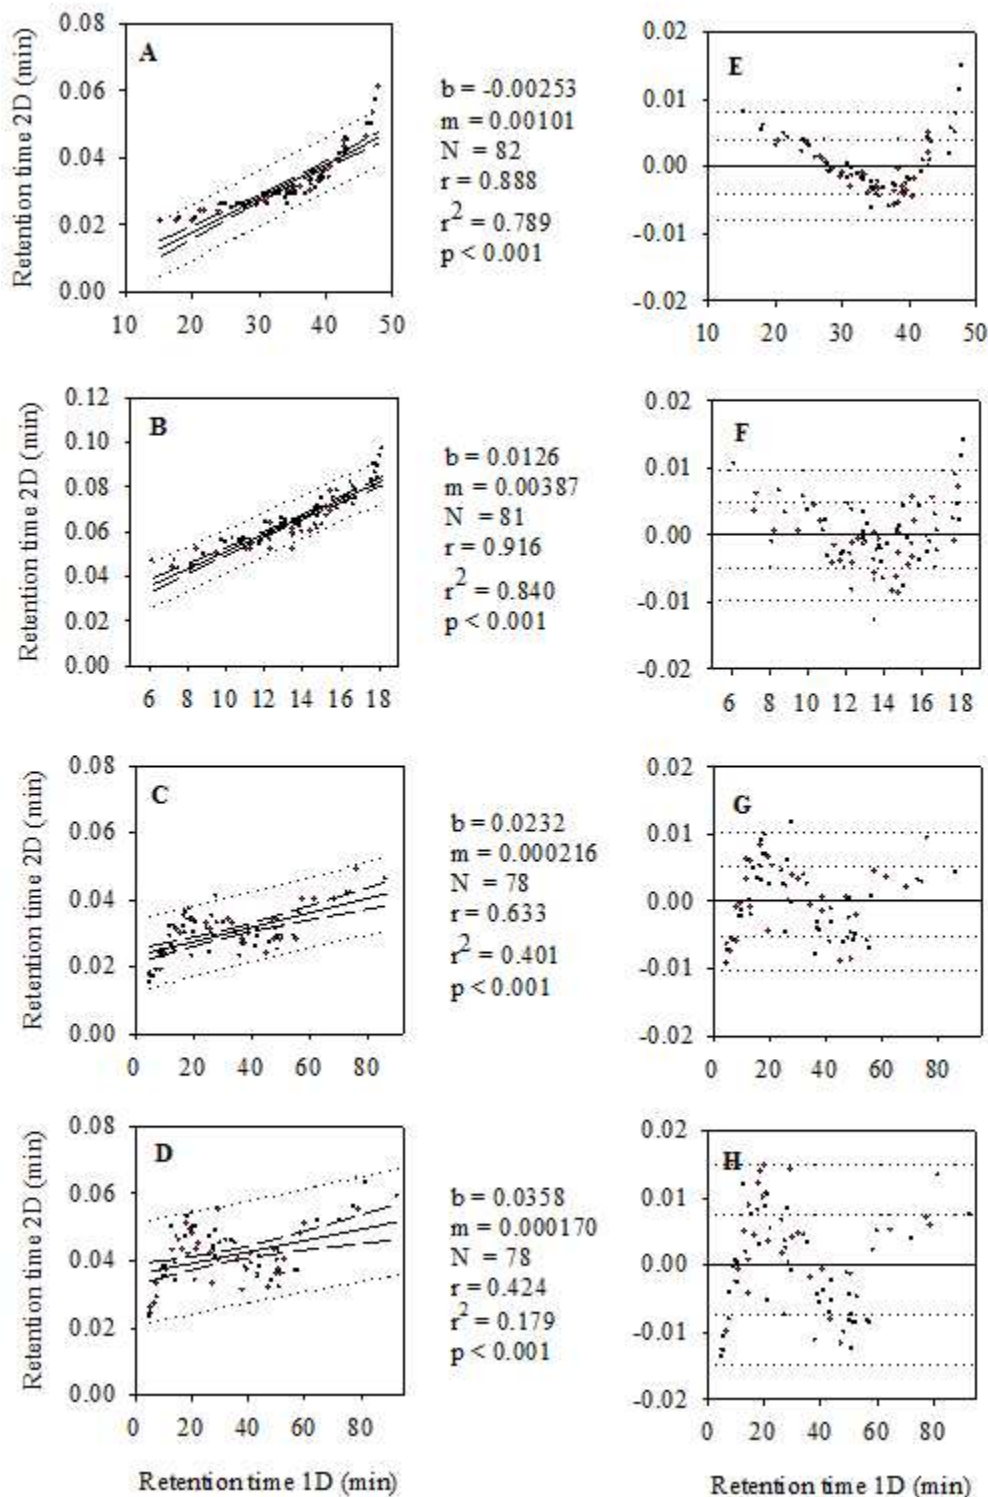

**Figure S8:** Correlation of 1D retention time with 2D retention time for PAHs analyzed with four different column combinations: (A) Combination “A1”, (B) Combination “A2”, (C) Combination “B”, and (D) Combination “C”. Values for the slope, y-intercept, and correlation coefficients are shown; the larger dashed lines represent the 95% CI for the regression and the smaller dashed lines the 95% CI for the population. Scatter plot residuals for the linear regression for the four different column combinations used: (E) Combination “A1”, (F) Combination “A2”, (G) Combination “B”, and (H) Combination “C”. The dashed lines represent the upper and lower control limit and upper and lower specification being 2 and 3 standard deviations, respectively.

|   |        |        |    |    |    |   |   |   |                                                                                                                                                                                                                     |    |      |    |      |      |      |        |        |
|---|--------|--------|----|----|----|---|---|---|---------------------------------------------------------------------------------------------------------------------------------------------------------------------------------------------------------------------|----|------|----|------|------|------|--------|--------|
| A | 0      | 0      | 0  | 0  | 0  | 0 | 0 | 2 | <table border="1"> <tbody> <tr> <td>Hx</td> <td>2.81</td> </tr> <tr> <td>Hy</td> <td>2.43</td> </tr> <tr> <td>Hy x</td> <td>0.85</td> </tr> <tr> <td><math>\Phi</math></td> <td>34.68%</td> </tr> </tbody> </table> | Hx | 2.81 | Hy | 2.43 | Hy x | 0.85 | $\Phi$ | 34.68% |
|   | Hx     | 2.81   |    |    |    |   |   |   |                                                                                                                                                                                                                     |    |      |    |      |      |      |        |        |
|   | Hy     | 2.43   |    |    |    |   |   |   |                                                                                                                                                                                                                     |    |      |    |      |      |      |        |        |
|   | Hy x   | 0.85   |    |    |    |   |   |   |                                                                                                                                                                                                                     |    |      |    |      |      |      |        |        |
|   | $\Phi$ | 34.68% |    |    |    |   |   |   |                                                                                                                                                                                                                     |    |      |    |      |      |      |        |        |
|   | 0      | 0      | 0  | 0  | 0  | 0 | 0 | 2 |                                                                                                                                                                                                                     |    |      |    |      |      |      |        |        |
|   | 0      | 0      | 0  | 0  | 0  | 0 | 1 | 4 |                                                                                                                                                                                                                     |    |      |    |      |      |      |        |        |
|   | 0      | 0      | 0  | 0  | 0  | 0 | 7 | 0 |                                                                                                                                                                                                                     |    |      |    |      |      |      |        |        |
| 0 | 0      | 0      | 0  | 0  | 2  | 4 | 0 |   |                                                                                                                                                                                                                     |    |      |    |      |      |      |        |        |
| 0 | 0      | 0      | 0  | 1  | 12 | 1 | 0 |   |                                                                                                                                                                                                                     |    |      |    |      |      |      |        |        |
| 0 | 0      | 5      | 12 | 16 | 2  | 0 | 0 |   |                                                                                                                                                                                                                     |    |      |    |      |      |      |        |        |
| 3 | 4      | 2      | 2  | 0  | 0  | 0 | 0 |   |                                                                                                                                                                                                                     |    |      |    |      |      |      |        |        |
| B | 0      | 0      | 0  | 0  | 0  | 0 | 0 | 2 | <table border="1"> <tbody> <tr> <td>Hx</td> <td>2.77</td> </tr> <tr> <td>Hy</td> <td>2.74</td> </tr> <tr> <td>Hy x</td> <td>1.33</td> </tr> <tr> <td><math>\Phi</math></td> <td>48.59%</td> </tr> </tbody> </table> | Hx | 2.77 | Hy | 2.74 | Hy x | 1.33 | $\Phi$ | 48.59% |
|   | Hx     | 2.77   |    |    |    |   |   |   |                                                                                                                                                                                                                     |    |      |    |      |      |      |        |        |
|   | Hy     | 2.74   |    |    |    |   |   |   |                                                                                                                                                                                                                     |    |      |    |      |      |      |        |        |
|   | Hy x   | 1.33   |    |    |    |   |   |   |                                                                                                                                                                                                                     |    |      |    |      |      |      |        |        |
|   | $\Phi$ | 48.59% |    |    |    |   |   |   |                                                                                                                                                                                                                     |    |      |    |      |      |      |        |        |
|   | 0      | 0      | 0  | 0  | 0  | 0 | 0 | 5 |                                                                                                                                                                                                                     |    |      |    |      |      |      |        |        |
|   | 0      | 0      | 0  | 0  | 0  | 0 | 4 | 3 |                                                                                                                                                                                                                     |    |      |    |      |      |      |        |        |
|   | 0      | 0      | 0  | 0  | 0  | 5 | 8 | 1 |                                                                                                                                                                                                                     |    |      |    |      |      |      |        |        |
| 0 | 0      | 0      | 1  | 4  | 5  | 2 | 0 |   |                                                                                                                                                                                                                     |    |      |    |      |      |      |        |        |
| 0 | 0      | 1      | 2  | 11 | 6  | 0 | 0 |   |                                                                                                                                                                                                                     |    |      |    |      |      |      |        |        |
| 0 | 2      | 3      | 8  | 3  | 0  | 0 | 0 |   |                                                                                                                                                                                                                     |    |      |    |      |      |      |        |        |
| 3 | 2      | 0      | 0  | 0  | 0  | 0 | 0 |   |                                                                                                                                                                                                                     |    |      |    |      |      |      |        |        |
| C | 0      | 0      | 0  | 0  | 0  | 0 | 0 | 2 | <table border="1"> <tbody> <tr> <td>Hx</td> <td>2.65</td> </tr> <tr> <td>Hy</td> <td>2.55</td> </tr> <tr> <td>Hy x</td> <td>1.64</td> </tr> <tr> <td><math>\Phi</math></td> <td>64.42%</td> </tr> </tbody> </table> | Hx | 2.65 | Hy | 2.55 | Hy x | 1.64 | $\Phi$ | 64.42% |
|   | Hx     | 2.65   |    |    |    |   |   |   |                                                                                                                                                                                                                     |    |      |    |      |      |      |        |        |
|   | Hy     | 2.55   |    |    |    |   |   |   |                                                                                                                                                                                                                     |    |      |    |      |      |      |        |        |
|   | Hy x   | 1.64   |    |    |    |   |   |   |                                                                                                                                                                                                                     |    |      |    |      |      |      |        |        |
|   | $\Phi$ | 64.42% |    |    |    |   |   |   |                                                                                                                                                                                                                     |    |      |    |      |      |      |        |        |
|   | 0      | 0      | 1  | 0  | 0  | 0 | 2 | 0 |                                                                                                                                                                                                                     |    |      |    |      |      |      |        |        |
|   | 0      | 1      | 0  | 0  | 1  | 1 | 1 | 0 |                                                                                                                                                                                                                     |    |      |    |      |      |      |        |        |
|   | 2      | 9      | 5  | 1  | 3  | 1 | 0 | 0 |                                                                                                                                                                                                                     |    |      |    |      |      |      |        |        |
| 2 | 4      | 5      | 4  | 7  | 0  | 0 | 0 |   |                                                                                                                                                                                                                     |    |      |    |      |      |      |        |        |
| 8 | 0      | 1      | 4  | 2  | 0  | 0 | 0 |   |                                                                                                                                                                                                                     |    |      |    |      |      |      |        |        |
| 2 | 1      | 0      | 1  | 0  | 0  | 0 | 0 |   |                                                                                                                                                                                                                     |    |      |    |      |      |      |        |        |
| 7 | 0      | 0      | 0  | 0  | 0  | 0 | 0 |   |                                                                                                                                                                                                                     |    |      |    |      |      |      |        |        |
| D | 0      | 0      | 0  | 0  | 0  | 0 | 1 | 1 | <table border="1"> <tbody> <tr> <td>Hx</td> <td>2.63</td> </tr> <tr> <td>Hy</td> <td>2.74</td> </tr> <tr> <td>Hy x</td> <td>1.94</td> </tr> <tr> <td><math>\Phi</math></td> <td>70.85%</td> </tr> </tbody> </table> | Hx | 2.63 | Hy | 2.74 | Hy x | 1.94 | $\Phi$ | 70.85% |
|   | Hx     | 2.63   |    |    |    |   |   |   |                                                                                                                                                                                                                     |    |      |    |      |      |      |        |        |
|   | Hy     | 2.74   |    |    |    |   |   |   |                                                                                                                                                                                                                     |    |      |    |      |      |      |        |        |
|   | Hy x   | 1.94   |    |    |    |   |   |   |                                                                                                                                                                                                                     |    |      |    |      |      |      |        |        |
|   | $\Phi$ | 70.85% |    |    |    |   |   |   |                                                                                                                                                                                                                     |    |      |    |      |      |      |        |        |
|   | 0      | 2      | 1  | 0  | 0  | 0 | 2 | 0 |                                                                                                                                                                                                                     |    |      |    |      |      |      |        |        |
|   | 1      | 5      | 1  | 0  | 1  | 2 | 1 | 0 |                                                                                                                                                                                                                     |    |      |    |      |      |      |        |        |
|   | 3      | 5      | 6  | 0  | 2  | 0 | 0 | 0 |                                                                                                                                                                                                                     |    |      |    |      |      |      |        |        |
| 5 | 2      | 3      | 5  | 2  | 0  | 0 | 0 |   |                                                                                                                                                                                                                     |    |      |    |      |      |      |        |        |
| 4 | 1      | 1      | 4  | 6  | 0  | 0 | 0 |   |                                                                                                                                                                                                                     |    |      |    |      |      |      |        |        |
| 3 | 0      | 0      | 2  | 1  | 0  | 0 | 0 |   |                                                                                                                                                                                                                     |    |      |    |      |      |      |        |        |
| 5 | 0      | 0      | 0  | 0  | 0  | 0 | 0 |   |                                                                                                                                                                                                                     |    |      |    |      |      |      |        |        |

**Figure S9:** Orthogonality calculation based on conditional entropy for the four different column combinations used: (A) Combination “A1”, (B) Combination “A2”, (C) Combination “B”, (D) Combination “C”. The numbers represent the number of PAHs eluting in each box of the normalized separation space and its distribution represent the distribution of PAHs in the two-dimensional space. Conditional entropy ( $H(Y|X)$ ) and orthogonality ( $\Phi$ ) calculated for four column combinations are also shown.

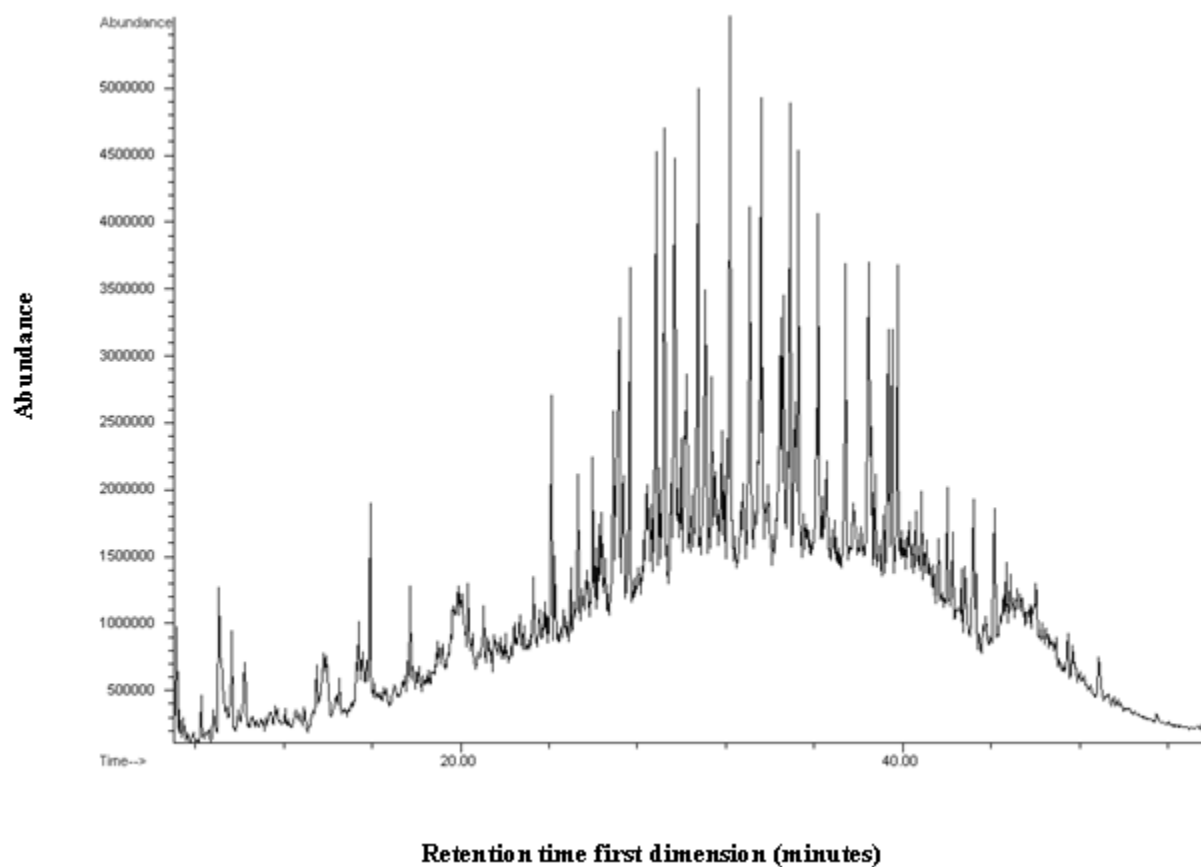

**Figure S10:** TIC for Beijing atmospheric PM<sub>2.5</sub> sample extract analyzed using a one-dimensional GC/MS with a 30m × 0.25mm × 0.25μm DB-5ms.

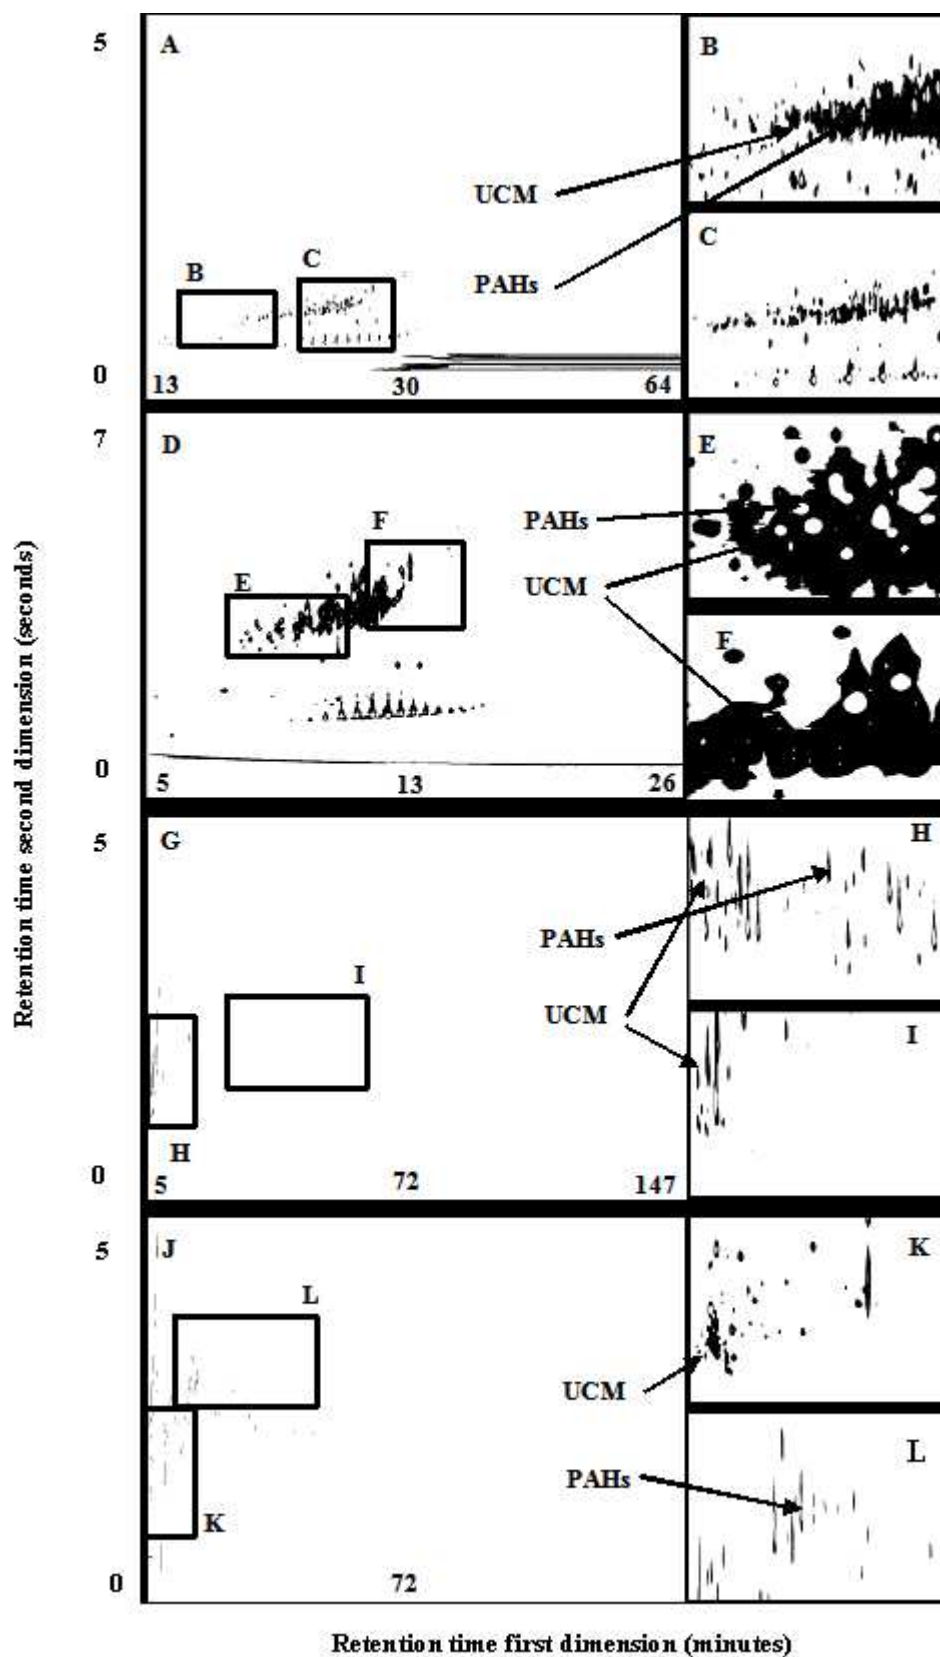

**Figure S11:** TIC for Beijing atmospheric PM<sub>2.5</sub> sample extract analyzed using the four different column combinations: (A) Combination "A1" (D) Combination "A2", (G) Combination "B", (J) Combination "C". The inner boxes show the UCM distributed in different places in the four chromatograms.

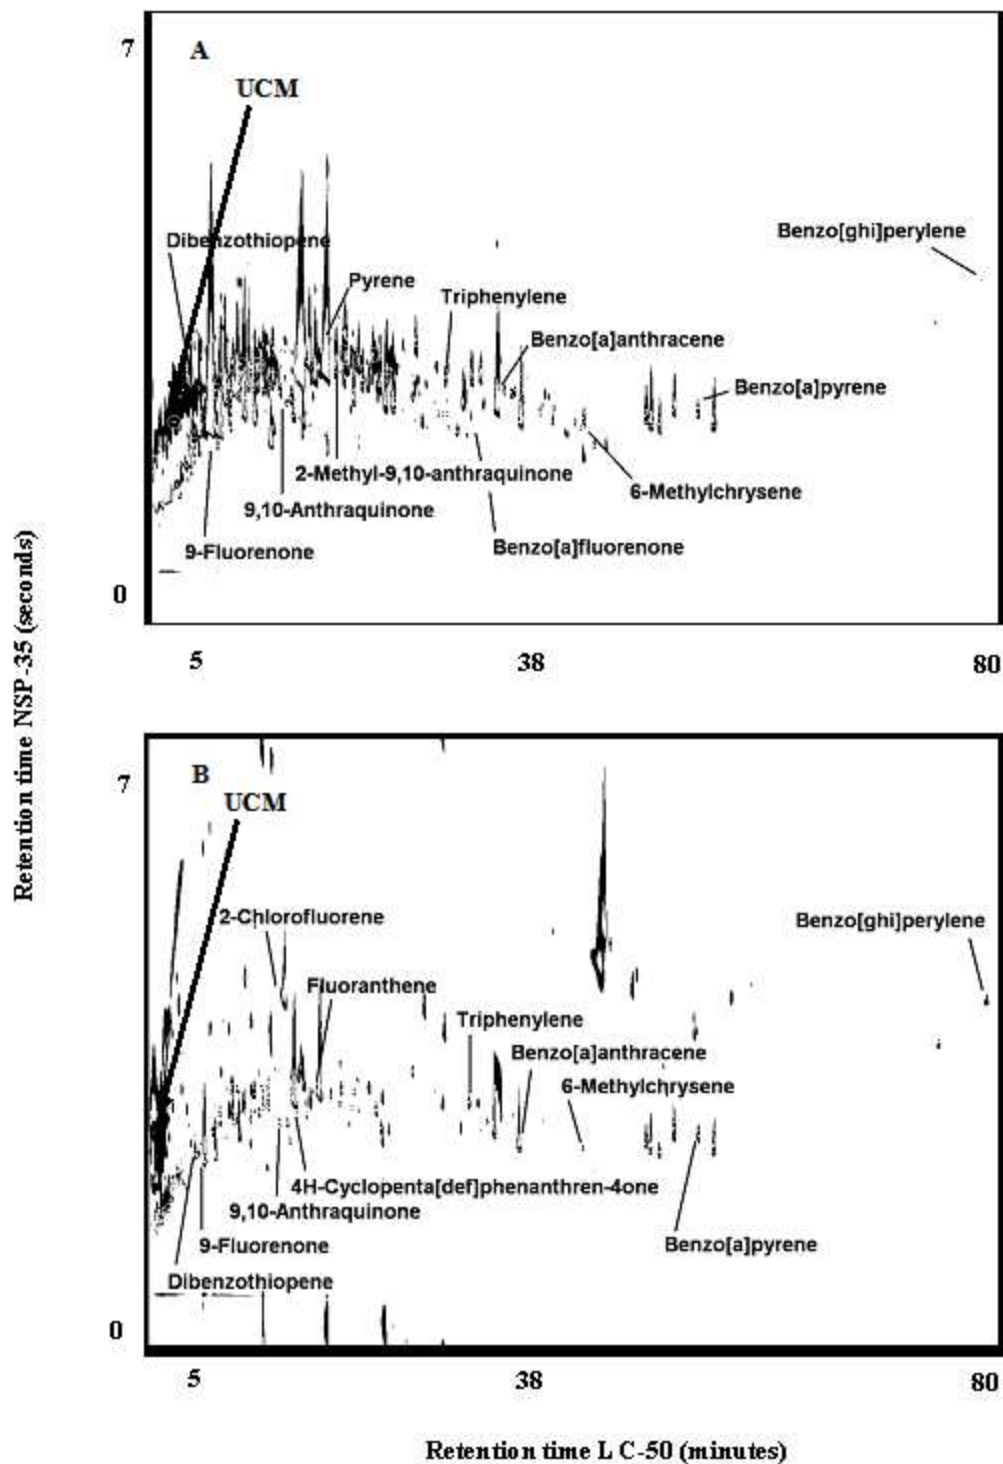

**Figure S12:** TIC of environmental samples analyzed using column combination “C”. (A) Soil sample extract from St. Maries Creosote Superfund Site and (B) Sediment sample extract from Portland Harbor Superfund Site. Some of the PAHs identified have been labeled.

**Table S1:** PAHs analyzed using a GC×GC/ToF-MS system. Parent PAHs (PPAHs), alkylated PAHs (MPAHs), chloro-PAHs (ClPAHs), bromo-PAHs (BrPAHs), nitro-PAHs (NPAHs), thio-PAHs (SPAHS), oxy-PAHs (OPAHs) and PAHs with molecular weight  $\geq 300$  Da (HMW PAHs) are shown

| N°                  | Name                    | Abbreviation | Ions (m/z) | "A1" (min) |       | "A2" (min) |       | "B" (min)         |                   | "C" (min)         |                   |
|---------------------|-------------------------|--------------|------------|------------|-------|------------|-------|-------------------|-------------------|-------------------|-------------------|
|                     |                         |              |            | 1D Rt      | 2D Rt | 1D Rt      | 2D Rt | 1D Rt             | 2D Rt             | 1D Rt             | 2D Rt             |
| <b><u>PPAHs</u></b> |                         |              |            |            |       |            |       |                   |                   |                   |                   |
| 1                   | Naphthalene             | NAP          | 128        | 15.33      | 0.021 | 6.17       | 0.047 | n.d. <sup>a</sup> | n.d. <sup>a</sup> | n.d. <sup>a</sup> | n.d. <sup>a</sup> |
| 2                   | Acenaphthylene          | ACY          | 152        | 21.33      | 0.024 | 8.5        | 0.052 | 5.416             | 0.017             | 5.666             | 0.024             |
| 3                   | Acenaphthene            | ACE          | 153        | 21.99      | 0.024 | 8.85       | 0.05  | 5.333             | 0.018             | 5.666             | 0.026             |
| 4                   | Fluorene                | FLO          | 166        | 23.99      | 0.024 | 9.55       | 0.05  | 6.582             | 0.017             | 6.832             | 0.027             |
| 5                   | Phenanthrene            | PHE          | 178        | 27.66      | 0.026 | 10.95      | 0.057 | 9.413             | 0.025             | 10.08             | 0.038             |
| 6                   | Anthracene              | ANT          | 178        | 27.82      | 0.026 | 10.95      | 0.057 | 10.41             | 0.024             | 11.16             | 0.037             |
| 7                   | Fluoranthene            | FLA          | 202        | 32.32      | 0.029 | 12.7       | 0.061 | 19.16             | 0.034             | 20.57             | 0.048             |
| 8                   | Pyrene                  | PYR          | 202        | 33.15      | 0.03  | 12.93      | 0.066 | 16.91             | 0.032             | 18.24             | 0.047             |
| 9                   | Benzo(a)anthracene      | BaA          | 228        | 37.81      | 0.032 | 14.79      | 0.067 | 34.81             | 0.03              | 36.73             | 0.04              |
| 10                  | Chrysene                | CHR          | 228        | 37.98      | 0.033 | 14.79      | 0.07  | 37.23             | 0.028             | 39.06             | 0.038             |
| 11                  | Triphenylene            | TRI          | 228        | 37.98      | 0.033 | 14.79      | 0.07  | 32.4              | 0.034             | 34.31             | 0.046             |
| 12                  | Benzo(b)fluoranthene    | BbF          | 252        | 41.81      | 0.039 | 16.19      | 0.075 | 48.97             | 0.029             | 50.97             | 0.037             |
| 13                  | Benzo(k)fluoranthene    | BkF          | 252        | 41.89      | 0.039 | 16.31      | 0.073 | 49.88             | 0.028             | 51.88             | 0.036             |
| 14                  | Benzo(e)pyrene          | BeP          | 252        | 42.81      | 0.045 | 16.54      | 0.082 | 50.97             | 0.032             | 53.13             | 0.04              |
| 15                  | Benzo(a)pyrene          | BaP          | 252        | 42.98      | 0.046 | 16.66      | 0.08  | 54.8              | 0.029             | 56.88             | 0.037             |
| 16                  | Indeno(1,2,3-c,d)pyrene | IcdP         | 276        | 47.06      | 0.053 | 17.94      | 0.089 | 72.87             | 0.042             | 77.61             | 0.056             |
| 17                  | Dibenzo[a,h]anthracene  | DahA         | 278        | 47.06      | 0.053 | 17.94      | 0.089 | 74.28             | 0.042             | 79.28             | 0.055             |
| 18                  | Benzo[g,h,i]perylene    | BghiP        | 276        | 47.97      | 0.061 | 18.18      | 0.097 | 76.2              | 0.049             | 81.77             | 0.063             |
| 19                  | Picene                  | PIC          | 278        | 47.56      | 0.057 | 18.06      | 0.094 | 86.19             | 0.046             | 92.85             | 0.059             |

| N°                   | Name                     | Abbreviation | Ions (m/z) | "A1" (min) |       | "A2" (min) |       | "B" (min)         |                    | "C" (min)          |                    |
|----------------------|--------------------------|--------------|------------|------------|-------|------------|-------|-------------------|--------------------|--------------------|--------------------|
|                      |                          |              |            | 1D Rt      | 2D Rt | 1D Rt      | 2D Rt | 1D Rt             | 2D Rt              | 1D Rt              | 2D Rt              |
| <b><u>MAPHs</u></b>  |                          |              |            |            |       |            |       |                   |                    |                    |                    |
| 20                   | 1-Methylnaphthalene      | 1 met NAP    | 142        | 17.91      | 0.021 | 7.22       | 0.044 | n.d. <sup>a</sup> | n.d. <sup>a</sup>  | n.d. <sup>a</sup>  | n.d. <sup>a</sup>  |
| 21                   | 2-Methylnaphthalene      | 2 met NAP    | 142        | 18.25      | 0.022 | 7.33       | 0.047 | n.d. <sup>a</sup> | n.d. <sup>a</sup>  | n.d. <sup>a</sup>  | n.d. <sup>a</sup>  |
| 22                   | Retene                   | RET          | 219        | 34.4       | 0.026 | 13.51      | 0.052 | 17.57             | 0.036              | 18.91              | 0.053              |
| 23                   | 1,3-Dimethylnaphthalene  | 1,3 met NAP  | 156        | 20.24      | 0.021 | 8.15       | 0.043 | 5.08 <sup>b</sup> | 0.015 <sup>b</sup> | 5.167 <sup>b</sup> | 0.024 <sup>b</sup> |
| 24                   | 2,6-Dimethylnaphthalene  | 2,6 met NAP  | 156        | 20.58      | 0.022 | 8.26       | 0.045 | 5.17 <sup>b</sup> | 0.015 <sup>b</sup> | 5.250 <sup>b</sup> | 0.023 <sup>b</sup> |
| 25                   | 2-Methylanthracene       | 2 met ANT    | 192        | 29.82      | 0.026 | 11.76      | 0.054 | 13.41             | 0.025              | 14.41              | 0.039              |
| 26                   | 1-Methylphenanthrene     | 1 met PHE    | 192        | 30.07      | 0.027 | 11.88      | 0.056 | 12.24             | 0.029              | 13.24              | 0.043              |
| 27                   | 2,3-Dimethylphenanthrene | 2,3 met PHE  | 206        | 31.32      | 0.026 | 12.35      | 0.052 | 11.99             | 0.032              | 12.99              | 0.05               |
| 28                   | 6-Methylchrysene         | 6 met CHR    | 242        | 39.73      | 0.034 | 15.49      | 0.069 | 39.06             | 0.032              | 40.97              | 0.042              |
| 29                   | 1-Methylpyrene           | 1 met PYR    | 216        | 35.4       | 0.031 | 13.86      | 0.064 | 24.73             | 0.033              | 26.48              | 0.047              |
| <b><u>ClPAHs</u></b> |                          |              |            |            |       |            |       |                   |                    |                    |                    |
| 30                   | 2-Chloroanthracene       | 2 Cl ANT     | 212        | 31.49      | 0.028 | 12.35      | 0.056 | 13.58             | 0.024              | 14.74              | 0.047              |
| 31                   | 9-Chloroanthracene       | 9 Cl ANT     | 212        | 31.56      | 0.028 | 12.35      | 0.059 | 14.49             | 0.031              | 15.74              | 0.046              |
| 32                   | 9,10-Dichloroanthracene  | 9,10 Cl ANT  | 246        | 34.4       | 0.029 | 13.51      | 0.058 | 19.41             | 0.034              | 20.91              | 0.05               |
| 33                   | 1,9-Dichlorophenanthrene | 1,9 Cl PHE   | 246        | 34.65      | 0.029 | 13.51      | 0.059 | 20.07             | 0.034              | 21.57              | 0.05               |
| 34                   | 3,9-Dichlorophenanthrene | 3,9 Cl PHE   | 246        | 34.07      | 0.028 | 13.51      | 0.061 | 18.82             | 0.037              | 20.24              | 0.054              |
| 35                   | 9-Chlorofluorene         | 9 Cl FLO     | 200        | 27.91      | 0.025 | 11.06      | 0.052 | 10.25             | 0.023              | 11                 | 0.035              |
| 36                   | 1-Chloropyrene           | 1 Cl PYR     | 236        | 36.32      | 0.031 | 14.21      | 0.066 | 28.32             | 0.033              | 30.15              | 0.045              |
| 37                   | 3-Chlorofluoranthene     | 3 Cl FLA     | 236        | 35.48      | 0.03  | 13.86      | 0.062 | 26.07             | 0.031              | 27.82              | 0.044              |

| N°                   | Name                            | Abbreviation | Ions (m/z) | "A1" (min) |       | "A2" (min) |       | "B" (min)          |                    | "C" (min)          |                    |
|----------------------|---------------------------------|--------------|------------|------------|-------|------------|-------|--------------------|--------------------|--------------------|--------------------|
|                      |                                 |              |            | 1D Rt      | 2D Rt | 1D Rt      | 2D Rt | 1D Rt              | 2D Rt              | 1D Rt              | 2D Rt              |
| 38                   | 8-Chlorofluoranthene            | 8 Cl FLA     | 236        | 35.57      | 0.029 | 13.98      | 0.06  | 26.32              | 0.031              | 28.07              | 0.043              |
| 39                   | 3,9,10-Trichloropenanthrene     | 3,9,10CIPHE  | 280        | 37.07      | 0.029 | 14.44      | 0.06  | 26.73              | 0.035              | 28.57              | 0.049              |
| 40                   | 1,3-Dichlorofluorathene         | 1,3 Cl FLA   | 270        | 37.81      | 0.03  | 14.68      | 0.063 | 30.40 <sup>c</sup> | 0.033 <sup>c</sup> | 32.31 <sup>c</sup> | 0.046 <sup>c</sup> |
| 41                   | 3,8-Dichlorofluoranthene        | 3,8 Cl FLA   | 270        | 38.51      | 0.031 | 14.79      | 0.061 | 37.14 <sup>c</sup> | 0.027 <sup>c</sup> | 39.81 <sup>c</sup> | 0.037 <sup>c</sup> |
| 42                   | 3,4-Dichlorofluoranthene        | 3,4 Cl FLA   | 270        | 39.31      | 0.033 | 15.03      | 0.063 | 37.81 <sup>c</sup> | 0.027 <sup>c</sup> | 43.55 <sup>c</sup> | 0.036 <sup>c</sup> |
| 43                   | 7-Chlorobenzo(a)anthracene      | 7 Cl BaA     | 262        | 40.56      | 0.034 | 15.84      | 0.07  | 42.14              | 0.031              | 44.14              | 0.041              |
| 44                   | 3-Chlorobenzanthrone            | 3 Cl Benzan  | 264        | 40.81      | 0.037 | 15.84      | 0.078 | 48.22              | 0.028              | 50.3               | 0.036              |
| 45                   | 6,12-Dichlorochrysene           | 6,12 Cl CHR  | 296        | 43.14      | 0.042 | 16.66      | 0.072 | 47.39              | 0.034              | 49.47              | 0.043              |
| 46                   | 7,12-Dichlorobenzo(a)anthracene | 7,12 Cl BaA  | 296        | 43.31      | 0.045 | 16.78      | 0.075 | 48.72              | 0.034              | 50.8               | 0.043              |
| <b><u>BrPAHs</u></b> |                                 |              |            |            |       |            |       |                    |                    |                    |                    |
| 47                   | 2-Bromofluorene                 | 2 Br FLO     | 244        | 29.74      | 0.026 | 11.76      | 0.055 | 12.91              | 0.026              | 13.91              | 0.04               |
| 48                   | 9-Bromophenanthrene             | 9 Br PHE     | 256        | 32.9       | 0.029 | 12.93      | 0.061 | 16.99              | 0.035              | 18.32              | 0.051              |
| 49                   | 9-Bromoanthracene               | 9 Br ANT     | 256        | 33.23      | 0.029 | 13.05      | 0.062 | 18.24              | 0.034              | 19.66              | 0.049              |
| 50                   | 9,10-Dibromoanthracene          | 9,10 Br ANT  | 176        | 37.73      | 0.033 | 14.68      | 0.07  | 27.98              | 0.029              | 29.82              | 0.055              |
| 51                   | 1-Bromopyrene                   | 1 Br PYR     | 280        | 37.98      | 0.033 | 14.79      | 0.071 | 33.65              | 0.033              | 35.56              | 0.045              |
| 52                   | 7-Bromobenzo(a)anthracene       | 7 Br BaA     | 226        | 42.94      | 0.041 | 17.59      | 0.083 | 48.38              | 0.031              | 50.47              | 0.04               |
| 53                   | 7,11-Dibromobenzo(a)anthracene  | 7,11 Br BaA  | 226        | 46.14      | 0.046 | 17.71      | 0.08  | 56.46 <sup>d</sup> | 0.036 <sup>d</sup> | 58.88 <sup>d</sup> | 0.048 <sup>d</sup> |
| 54                   | 7,12-Dibromobenzo(a)anthracene  | 7,12 Br BaA  | 226        | 46.31      | 0.05  | 17.71      | 0.09  | 57.54 <sup>d</sup> | 0.04 <sup>d</sup>  | 60.13 <sup>d</sup> | 0.051 <sup>d</sup> |
| 55                   | 4,7-Dibromobenzo(a)anthracene   | 4,7 Br BaA   | 226        | 46.31      | 0.05  | 17.83      | 0.086 | 61.62 <sup>d</sup> | 0.04 <sup>d</sup>  | 64.79 <sup>d</sup> | 0.052 <sup>d</sup> |
| 56                   | 5,7-Dibromobenzo(a)anthracene   | 5,7 Br BaA   | 226        | 46.89      | 0.05  | 17.94      | 0.084 | 68.62 <sup>d</sup> | 0.04 <sup>d</sup>  | 72.70 <sup>d</sup> | 0.052 <sup>d</sup> |



| N°                  | Name                     | Abbreviation | Ions (m/z) | "A1" (min) |       | "A2" (min) |       | "B" (min) |       | "C" (min) |       |
|---------------------|--------------------------|--------------|------------|------------|-------|------------|-------|-----------|-------|-----------|-------|
|                     |                          |              |            | 1D Rt      | 2D Rt | 1D Rt      | 2D Rt | 1D Rt     | 2D Rt | 1D Rt     | 2D Rt |
| <b><u>NPAHs</u></b> |                          |              |            |            |       |            |       |           |       |           |       |
| 57                  | 1-Nitropyrene            | 1 N PYR      | 201        | 39.81      | 0.036 | 15.49      | 0.078 | 46.47     | 0.027 | 48.47     | 0.034 |
| 58                  | 2-Nitropyrene            | 2 N PYR      | 201        | 40.06      | 0.036 | 15.61      | 0.075 | 49.13     | 0.025 | 51.13     | 0.032 |
| 59                  | 2-Nitrofluoranthene      | 2 N FLA      | 247        | 38.98      | 0.033 | 15.26      | 0.067 | 41.72     | 0.026 | 43.72     | 0.035 |
| 60                  | 3-Nitrobenzanthrone      | 3 N Benzan   | 200        | 43.28      | 0.045 | n.d.       | n.d.  | n.d.      | n.d.  | n.d.      | n.d.  |
| 61                  | 2-Nitrofluorene          | 2 N FLO      | 165        | 24.69      | 0.026 | 12.93      | 0.063 | 25.82     | 0.024 | 27.48     | 0.033 |
| 62                  | 3-Nitrofluoranthene      | 3 N FLA      | 247        | 39.06      | 0.034 | 15.26      | 0.071 | 45.39     | 0.024 | 47.39     | 0.032 |
| 63                  | 2-Nitroanthracene        | 2 N ANT      | 223        | 35.15      | 0.03  | 13.75      | 0.065 | 36.31     | 0.023 | 38.14     | 0.031 |
| 64                  | 3-Nitrophenanthrene      | 3 N PHE      | 223        | 34.48      | 0.03  | 13.63      | 0.063 | 27.98     | 0.041 | 29.82     | 0.04  |
| 65                  | 9-Nitroanthracene        | 9 N ANT      | 176        | 33.4       | 0.03  | 13.16      | 0.065 | 20.99     | 0.033 | 22.49     | 0.045 |
| 66                  | 5-Nitroacenaphthalene    | 5 N ACE      | 152        | 31.4       | 0.029 | 12.35      | 0.064 | 17.41     | 0.03  | 18.74     | 0.042 |
| 67                  | 1-Nitronaphthalene       | 1 N NAP      | 127        | 24.32      | 0.026 | 9.78       | 0.056 | 8.75      | 0.019 | 7.748     | 0.029 |
| 68                  | 2-Nitronaphthalene       | 2 N NAP      | 127        | 25.16      | 0.026 | 10.01      | 0.055 | 7.33      | 0.019 | 7.748     | 0.033 |
| 69                  | 6-Nitrochrysene          | 6 N CHR      | 273        | 42.91      | 0.043 | 16.43      | 0.075 | 55.55     | 0.028 | 57.71     | 0.037 |
| 70                  | 9-Nitrophenanthrene      | 9 N PHE      | 165        | 34.4       | 0.03  | 13.51      | 0.065 | 24.99     | 0.031 | 26.73     | 0.042 |
| 71                  | 2-Nitrobiphenyl          | 2 N BiPhe    | 152        | 25.96      | 0.025 | 10.36      | 0.057 | 13.58     | 0.032 | 14.58     | 0.034 |
| 72                  | 3-Nitrobiphenyl          | 3 N BiPhe    | 152        | 28.16      | 0.025 | 11.3       | 0.052 | 10        | 0.025 | 10.75     | 0.038 |
| 73                  | 4-Nitrobiphenyl          | 4 N BiPhe    | 152        | 28.65      | 0.026 | 11.41      | 0.055 | 10        | 0.025 | 10.75     | 0.038 |
| 74                  | 7-Nitrobenz(a)anthracene | 7 N BaA      | 215        | 42.14      | 0.041 | 16.78      | 0.078 | 50.72     | 0.029 | 52.71     | 0.036 |
| 75                  | 3-Nitrodibenzofuran      | 3 N Diben    | 213        | 30.85      | 0.027 | 12.23      | 0.057 | 19.82     | 0.023 | 21.24     | 0.034 |

| N°                     | Name                         | Abbreviation | Ions (m/z) | "A1" (min)        |                   | "A2" (min)        |                   | "B" (min)           |                    | "C" (min)           |                    |
|------------------------|------------------------------|--------------|------------|-------------------|-------------------|-------------------|-------------------|---------------------|--------------------|---------------------|--------------------|
|                        |                              |              |            | 1D Rt             | 2D Rt             | 1D Rt             | 2D Rt             | 1D Rt               | 2D Rt              | 1D Rt               | 2D Rt              |
| <b><u>SPAHS</u></b>    |                              |              |            |                   |                   |                   |                   |                     |                    |                     |                    |
| 76                     | Dibenzothiophene             | Dibenzoth    | 184        | 27.16             | 0.026             | 10.83             | 0.055             | 8.66                | 0.024              | 9.247               | 0.037              |
| 77                     | 2-Nitrodibenzothiophene      | 2 N Dib      | 229        | 35.31             | 0.029             | 13.75             | 0.064             | 27.15               | 0.029              | 28.9                | 0.041              |
| <b><u>OPAHS</u></b>    |                              |              |            |                   |                   |                   |                   |                     |                    |                     |                    |
| 78                     | 9,10-Anthraquinone           | 9,10 ANTq    | 208        | 30.82             | 0.029             | 12.11             | 0.064             | 15.83               | 0.03               | 16.99               | 0.043              |
| 79                     | 9-Fluorenone                 | 9 Fluo       | 180        | 26.82             | 0.026             | 10.71             | 0.056             | 9.5                 | 0.023              | 10.16               | 0.035              |
| 80                     | 2-Methyl-9,10-anthraquinone  | 2 met ANTq   | 222        | 32.9              | 0.029             | 12.93             | 0.062             | 20.32               | 0.03               | 21.82               | 0.043              |
| 81                     | Benzanthrone                 | Benzan       | 230        | 38.4              | 0.036             | 15.03             | 0.075             | 39.22               | 0.03               | 41.22               | 0.039              |
| 82                     | Benz(a)anthracene-7,12-dione | BaAq         | 258        | 39.56             | 0.035             | 15.49             | 0.071             | 42.22               | 0.029              | 44.22               | 0.038              |
| <b><u>HMW PAHs</u></b> |                              |              |            |                   |                   |                   |                   |                     |                    |                     |                    |
| 83                     | Coronene                     | COR          | 300        | 53.22             | 0.078             | n.d. <sup>g</sup> | n.d. <sup>g</sup> | 147.23              | 0.007              | n.d.                | n.d.               |
| 84                     | Naphtho[1,2-b]fluoranthene   | DahPYR       | 302        | 51.22             | 0.063             | n.d. <sup>g</sup> | n.d. <sup>g</sup> | 101.43 <sup>e</sup> | 0.08 <sup>e</sup>  | 111.3 <sup>e</sup>  | 0.016 <sup>e</sup> |
| 85                     | Naphtho[2,3-j]fluoranthene   | DaePYR       | 302        | 51.47             | 0.064             | n.d. <sup>g</sup> | n.d. <sup>g</sup> | 110.25 <sup>e</sup> | 0.078 <sup>e</sup> | 121.6 <sup>e</sup>  | 0.014 <sup>e</sup> |
| 86                     | Dibenzo[a,e]fluoranthene     | DalPYR       | 302        | 51.55             | 0.065             | n.d. <sup>g</sup> | n.d. <sup>g</sup> | 111.92 <sup>e</sup> | 0.071 <sup>e</sup> | 123.3 <sup>e</sup>  | 0.01 <sup>e</sup>  |
| 87                     | Dibenzo[b,k]fluoranthene     | DaiPYR       | 302        | n.d. <sup>f</sup> | n.d. <sup>f</sup> | n.d. <sup>g</sup> | n.d. <sup>g</sup> | 115.83 <sup>e</sup> | 0.076              | 127.9 <sup>e</sup>  | 0.014 <sup>e</sup> |
| 88                     | Dibenzo[a,k]fluoranthene     | N23aPYR      | 302        | n.d. <sup>f</sup> | n.d. <sup>f</sup> | n.d. <sup>g</sup> | n.d. <sup>g</sup> | 117.33 <sup>e</sup> | 0.074 <sup>e</sup> | 134.6 <sup>e</sup>  | 0.01 <sup>e</sup>  |
| 89                     | Dibenzo[j,l]fluoranthene     | N23ePYR      | 302        | 51.64             | 0.067             | n.d. <sup>g</sup> | n.d. <sup>g</sup> | 121.75 <sup>e</sup> | 0.074 <sup>e</sup> | 146.3 <sup>e</sup>  | 0.013 <sup>e</sup> |
| 90                     | Dibenzo[a,l]pyrene           | DbkFLA       | 302        | 51.8              | 0.069             | n.d. <sup>g</sup> | n.d. <sup>g</sup> | 131.82 <sup>e</sup> | 0.074 <sup>e</sup> | 146.3e              | 0.026 <sup>e</sup> |
| 91                     | Naphtho[2,3-k]fluoranthene   | N12bFLA      | 302        | n.d. <sup>f</sup> | n.d. <sup>f</sup> | n.d. <sup>g</sup> | n.d. <sup>g</sup> | 131.90 <sup>e</sup> | 0.002 <sup>e</sup> | 150.97 <sup>e</sup> | 0.012 <sup>e</sup> |

| N° | Name                 | Abbreviation | Ions (m/z) | "A1" (min) |       | "A2" (min)        |                   | "B" (min)           |                    | "C" (min)           |                    |
|----|----------------------|--------------|------------|------------|-------|-------------------|-------------------|---------------------|--------------------|---------------------|--------------------|
|    |                      |              |            | 1D Rt      | 2D Rt | 1D Rt             | 2D Rt             | 1D Rt               | 2D Rt              | 1D Rt               | 2D Rt              |
| 92 | Naphtho[2,3-e]pyrene | DeIPYR       | 302        | 53.8       | 0.069 | n.d. <sup>g</sup> | n.d. <sup>g</sup> | 135.73 <sup>c</sup> | 0.074 <sup>e</sup> | 154.97 <sup>c</sup> | 0.031 <sup>e</sup> |
| 93 | Dibenzo[a,e]pyrene   | DakFLA       | 302        | 53.64      | 0.073 | n.d. <sup>g</sup> | n.d. <sup>g</sup> | 138.90 <sup>c</sup> | 0.007 <sup>e</sup> | 164.38 <sup>c</sup> | 0.034 <sup>e</sup> |
| 94 | Dibenzo[e,l]pyrene   | DjlFLA       | 302        | 52.7       | 0.073 | n.d. <sup>g</sup> | n.d. <sup>g</sup> | 150.72 <sup>c</sup> | 0.012 <sup>e</sup> | n.d. <sup>f</sup>   | n.d. <sup>f</sup>  |
| 95 | Naphtho[2,3-a]pyrene | DaeFLA       | 302        | 54.08      | 0.077 | n.d. <sup>g</sup> | n.d. <sup>g</sup> | 157.97 <sup>c</sup> | 0.079 <sup>e</sup> | n.d. <sup>f</sup>   | n.d. <sup>f</sup>  |
| 96 | Benzo[b]perylene     | N23jFLA      | 302        | 55.38      | 0.082 | n.d. <sup>g</sup> | n.d. <sup>g</sup> | n.d. <sup>f</sup>   | n.d. <sup>f</sup>  | n.d. <sup>f</sup>   | n.d. <sup>f</sup>  |
| 97 | Dibenzo[a,h]pyrene   | BbPER        | 302        | 54.75      | 0.082 | n.d. <sup>g</sup> | n.d. <sup>g</sup> | n.d. <sup>f</sup>   | n.d. <sup>f</sup>  | n.d. <sup>f</sup>   | n.d. <sup>f</sup>  |

n.d.: PAHs non detected, <sup>a</sup> PAHs eluted with the solvent line in less than 5 min, <sup>b</sup> Compounds share the same ions (146, 251 m/z), order may be reverted, <sup>c</sup> Compounds share the same ion (270 m/z), order may be reverted, <sup>d</sup> Compounds share the same ions (226, 386 m/z), order may be reverted, <sup>e</sup> Compounds share the same ions (302 m/z), order may be reverted, <sup>f</sup> not detected due to possible co-elution, <sup>g</sup> few broad signals detected, no compound was assigned.

**Table S2:** Retention times of co-eluting slices for some critical pairs of PAHs analyzed in a GC×GC/ToF-MS with three different column combinations.

|                         | PAHs pairs               | 1D Rt   | 2D Rt | 1D Rt   | 2D Rt | $\Delta 1D$ | $\Delta 2D$ |
|-------------------------|--------------------------|---------|-------|---------|-------|-------------|-------------|
| <b>Combination "A1"</b> | CHR - TRI                | 2278.8  | 1.98  | 2278.8  | 1.98  | 0           | 0           |
|                         | BbF - BkF                | 2508.69 | 2.32  | 2508.69 | 2.32  | 0           | 0           |
|                         | IcdP - DahA              | 2823.45 | 3.192 | 2823.45 | 3.165 | 0           | 0.027       |
|                         | 2 CI ANT - 9 CI ANT      | 1889.16 | 1.654 | 1889.16 | 1.654 | 0           | 0           |
|                         | 3 CI FLA - 8 CI FLA      | 2128.97 | 1.787 | 2128.97 | 1.787 | 0           | 0           |
|                         | 7,12 Br BaA - 4,7 Br BaA | 2778.48 | 3.027 | 2778.48 | 3.027 | 0           | 0           |
| <b>Combination "A2"</b> | CHR - TRI                | 887.4   | 4.2   | 887.4   | 4.2   | 0           | 0           |
|                         | BbF - BkF                | 971.4   | 4.5   | 971.4   | 4.38  | 0           | 0.12        |
|                         | IcdP - DahA              | 1076.4  | 5.34  | 1076.4  | 5.34  | 0           | 0           |
|                         | 2 CI ANT - 9 CI ANT      | 741     | 3.36  | 741     | 3.54  | 0           | 0.18        |
|                         | 3 CI FLA - 8 CI FLA      | 831.6   | 3.72  | 831.6   | 3.6   | 0           | 0.12        |
|                         | 7,12 Br BaA - 4,7 Br BaA | 1062.6  | 5.4   | 1062.6  | 5.16  | 0           | 0.24        |
| <b>Combination "B"</b>  | CHR - TRI                | 2233.8  | 1.68  | 1944    | 2.04  | 289.8       | 0.36        |
|                         | BbF - BkF                | 2938.2  | 1.74  | 2992.8  | 1.68  | 54.6        | 0.06        |
|                         | IcdP - DahA              | 4372.2  | 2.52  | 4456.8  | 2.52  | 84.6        | 0           |
|                         | 2 CI ANT - 9 CI ANT      | 814.8   | 1.44  | 869.4   | 1.44  | 54.6        | 0           |
|                         | 3 CI FLA - 8 CI FLA      | 1564.2  | 1.86  | 1579.2  | 1.86  | 15          | 0           |
|                         | 7,12 Br BaA - 4,7 Br BaA | 3452.4  | 2.4   | 3697.2  | 2.4   | 244.8       | 0           |
| <b>Combination "C"</b>  | CHR - TRI                | 2343.6  | 2.28  | 2058.6  | 2.76  | 285         | 0.48        |
|                         | BbF - BkF                | 3058.2  | 2.22  | 3112.8  | 2.16  | 54.6        | 0.06        |
|                         | IcdP - DahA              | 4656.6  | 3.36  | 4756.8  | 3.3   | 100.2       | 0.06        |
|                         | 2 CI ANT - 9 CI ANT      | 884.4   | 2.82  | 944.4   | 2.76  | 60          | 0.06        |
|                         | 3 CI FLA - 8 CI FLA      | 1669.2  | 2.64  | 1684.2  | 2.58  | 15          | 0.06        |
|                         | 7,12 Br BaA - 4,7 Br BaA | 3607.8  | 3.06  | 3887.4  | 3.12  | 279.6       | 0.06        |
